# Supplementary material
Source: PubMed Central journal article supplement (PMC3221452)
Supplement: JBT-11-2204-001_supplemental_information.pdf [file JBT-11-2204-001_supplemental_information.pdf]

## Exclusion List Effect of Four Settings

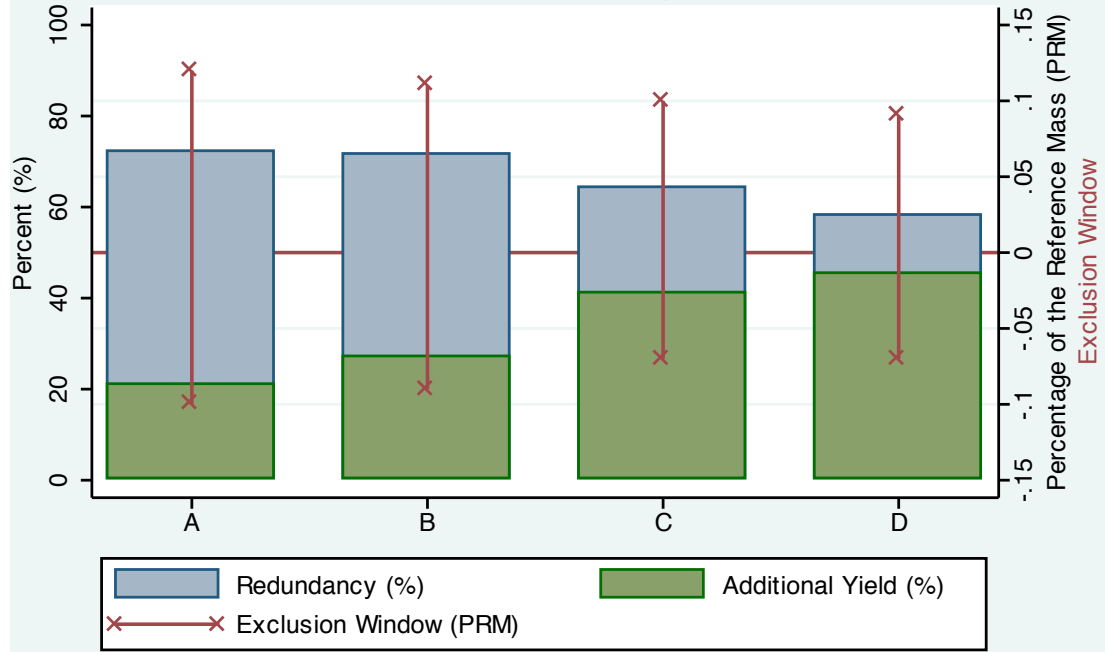

|                     | Setting A    | Setting B     | Setting C    | Setting D     |
|---------------------|--------------|---------------|--------------|---------------|
| Exclusion list size | 23           | 20            | 20           | 20            |
| PRM                 | -0.1 to 0.12 | -0.09 to 0.11 | -0.07 to 0.1 | -0.07 to 0.09 |
| Redundancy          | 72.1%        | 71.4%         | 64%          | 58.3%         |
| Additional yield    | 21%          | 27.2%         | 41%          | 44.5%         |
